# Supplementary material
Source: ML conference proceedings conference paper supplement (https://openaccess.thecvf.com/content/CVPR2025/html/Guo_MOS-Attack_A_Scalable_CVPR_2025_paper.html)
Supplement: Supplementary file 1 [file Guo_MOS-Attack_A_Scalable_CVPR_2025_supplemental.pdf]

# **MOS-Attack: A Scalable Multi-objective Adversarial Attack Framework**

Supplementary Material

Table 7. **Overall Results.** A comparative analysis of attack success rate among MOS-8 attacks with APGD-CE under large magnitude of attack budgets. For MOS-8 Attack, we record its  $K$  value, while for others it denoted the number of restarts. The optimal outcome is highlighted in bold and marked with a grey background.

| CIFAR-10 ( $\epsilon = 16/255$ ) |                                                 |                  | Attack Success Rate |              |              | Diff.(5)<br>MOS CE |
|----------------------------------|-------------------------------------------------|------------------|---------------------|--------------|--------------|--------------------|
|                                  |                                                 |                  | APGD<br>(5)         | MOS-8<br>(1) | MOS-8<br>(5) |                    |
| ID                               | Paper                                           | Architecture     |                     |              |              |                    |
| 0                                | Rade <i>et al.</i> (2022) [36] ( <i>ddpm</i> )  | PreActResNet-18  | 74.30               | 76.38        | <b>76.80</b> | +2.50              |
| 1                                | Rade <i>et al.</i> (2022) [36] ( <i>extra</i> ) | PreActResNet-18  | 83.13               | 82.48        | <b>83.36</b> | +0.23              |
| 2                                | Sehwag <i>et al.</i> (2022) [40]                | ResNet-18        | <b>77.51</b>        | 76.79        | 77.37        | -0.14              |
| 3                                | Chen <i>et al.</i> (2020) [9]                   | ResNet-50        | 81.66               | 82.29        | <b>82.40</b> | +0.74              |
| 4                                | Gowal <i>et al.</i> (2020) [22]                 | WideResNet-28-10 | 71.36               | 72.91        | <b>73.51</b> | +2.15              |
| 5                                | Wang <i>et al.</i> (2023) [47]                  | WideResNet-28-10 | 71.12               | 72.12        | <b>72.67</b> | +1.55              |
| 6                                | Rebuffi <i>et al.</i> (2021) [37]               | WideResNet-28-10 | 70.86               | 72.39        | <b>72.83</b> | +1.97              |
| 7                                | Sehwag <i>et al.</i> (2022) [40]                | WideResNet-34-10 | 72.45               | 72.43        | <b>72.95</b> | +0.5               |
| 8                                | Rade <i>et al.</i> (2022) [36]                  | WideResNet-34-10 | 75.59               | 75.76        | <b>76.21</b> | +0.62              |
| 9                                | Gowal <i>et al.</i> (2021) [23]                 | WideResNet-70-16 | 66.20               | 65.98        | <b>66.40</b> | +0.20              |
| 10                               | Gowal <i>et al.</i> (2020) [22]                 | WideResNet-70-16 | 70.84               | 71.22        | <b>71.67</b> | +0.83              |
| 11                               | Rebuffi <i>et al.</i> (2021) [37]               | WideResNet-70-16 | 73.02               | 73.43        | <b>73.98</b> | +0.96              |
| Average Rank                     |                                                 |                  | 2.58                | 2.33         | 1.1          |                    |
| ImageNet ( $\epsilon = 8/255$ )  |                                                 |                  |                     |              |              |                    |
| 12                               | Salman <i>et al.</i> (2020) [39]                | ResNet-18        | 89.02               | 90.74        | <b>90.90</b> | +1.88              |
| 13                               | Salman <i>et al.</i> (2020) [39]                | ResNet-50        | 85.06               | 85.36        | <b>85.84</b> | +0.78              |
| 14                               | Wong <i>et al.</i> (2020) [49]                  | ResNet-50        | 89.64               | 90.52        | <b>90.64</b> | +1.00              |
| 15                               | Engstrom <i>et al.</i> (2019) [17]              | ResNet-50        | 89.74               | 90.24        | <b>90.42</b> | +0.68              |
| 16                               | Salman <i>et al.</i> (2020) [39]                | WideResNet-50-2  | 84.80               | 84.96        | <b>85.16</b> | +0.36              |
| Average Rank                     |                                                 |                  | 3.00                | 2.00         | 1.00         |                    |
